# Supplementary material for: Structural Dynamics of Chloromethanes through Computational Spectroscopy: Combining INS and DFT
Source: MDPI journal article supplement (doi:10.3390/molecules27217661), 2022-11-07
Supplement: s1 [file s1]

# *Structural Dynamics of Chloromethanes through Computational Spectroscopy: Combining INS and DFT*

**Mariela M. Nolasco<sup>1\*</sup>, Mariana Matos Coimbra<sup>1</sup>, Stewart F. Parker<sup>2</sup>, Pedro D. Vaz<sup>3</sup>, and Paulo J. A. Ribeiro-Claro<sup>1</sup>**

<sup>1</sup> CICECO—Instituto de Materiais de Aveiro, Departamento de Química, Universidade de Aveiro, 3810-193 Aveiro, Portugal

<sup>2</sup> ISIS Neutron & Muon Source, STFC Rutherford Appleton Laboratory, Chilton, Didcot, Oxfordshire OX11 0QX, UK

<sup>3</sup> Champalimaud Foundation, Champalimaud Centre for the Unknown, 1400-038 Lisboa, Portugal

## *Supplementary Material*

### *Document 1 of 2*

#### **Contents**

Table S1. – Calculated and experimental INS wavenumbers of tetrachloromethane, CCl<sub>4</sub>.

Table S2. – Calculated and experimental INS wavenumbers of trichloromethane, CHCl<sub>3</sub>.

Table S3. – Calculated and experimental INS wavenumbers of dichloromethane, CH<sub>2</sub>Cl<sub>2</sub>.

**Table S1.** Calculated and experimental INS wavenumbers of tetrachloromethane, CCl<sub>4</sub>.

| CASTEP <sup>1</sup> | Experimental | Assignment | Approximate description |
|---------------------|--------------|------------|-------------------------|
| 725/702             | 790/765      | <b>v3</b>  | vCCl asym               |
| 440                 | 460          | <b>v1</b>  | vCCl sym                |
| 300                 | 315          | <b>v4</b>  | βCCl                    |
| 206                 | 219          | <b>v2</b>  | βCCl                    |
| 44                  | 70           | Lat        |                         |
| 20                  | 45           | Lat        |                         |

<sup>1</sup> Maxima in the INS simulated spectrum. v and β stand for stretching and bending modes, respectively; Lat indicates a lattice mode, both translational or with translational and librational components.

**Table S2.** Calculated and experimental INS wavenumbers of trichloromethane, CHCl<sub>3</sub>.

| CASTEP <sup>1</sup> | Experimental | Assignment | Approximate description |
|---------------------|--------------|------------|-------------------------|
| 3576                | 3680         | 3v4        |                         |
| 3056                | 3060         | <b>v1</b>  | vCH                     |
| 2364                | 2444         | 2v4        |                         |
| 1874                | 1975         | v4+v5      |                         |
| 1824                | 1894         | v4+v2      |                         |
| 1427                | 1484         | v4+v6      |                         |
| 1237                | 1291         | v4+Lat     |                         |
| 1175                | 1218         | <b>v4</b>  | βCH                     |
| 691                 | 756          | <b>v5</b>  | vCCl <sub>3</sub> asym  |
| 650                 | 670          | <b>v2</b>  | vCCl <sub>3</sub> sym   |
| 357                 | 368          | <b>v3</b>  | βCCl <sub>3</sub> sym   |
| 257/247             | 268/258      | <b>v6</b>  | βCCl <sub>3</sub> asym  |
| 93                  | 94           | Lat        |                         |
| 63                  | 81           | Lat        |                         |
| 45                  | 50           | Lib        |                         |

<sup>1</sup> Maxima in the INS simulated spectrum. v and β stand for stretching and bending modes, respectively; Lib stands for pure librational mode, while Lat indicates a lattice mode, both translational or with translational and librational components.

**Table S3.** Calculated and experimental INS wavenumbers of dichloromethane, CH<sub>2</sub>Cl<sub>2</sub>.

| CASTEP <sup>1</sup> | Experimental | Assignment | Approximate description  |
|---------------------|--------------|------------|--------------------------|
| 3117                | n.o.         | <b>v6</b>  | vCH <sub>2</sub> asym    |
| 3027                | n.o.         | <b>v1</b>  | vCH <sub>2</sub> sym     |
| 2373                | 2425         | 2v8        |                          |
| 2240                | 2323         | 2v5        |                          |
| 1623                | 1645         | v2+2Lib    |                          |
| 1504                | 1515         | v2+Lib     |                          |
| 1375                | 1390         | <b>v2</b>  | βCH <sub>2</sub> scissor |
| 1237                | 1270         | <b>v8</b>  | βCH <sub>2</sub> rock    |
| 1135                | 1160         | <b>v5</b>  | βCH <sub>2</sub> twist   |
| 994                 | 1015         | v7+Lib     |                          |
| 862                 | 892          | <b>v7</b>  | βCH <sub>2</sub> wag     |
| 702                 | 733          | <b>v9</b>  | vCCl <sub>2</sub> asym   |
| 690                 | 704          | <b>v3</b>  | vCCl <sub>2</sub> asym   |
| 380                 | 343          | 3Lib       |                          |
| 282                 | 290          | <b>v4</b>  | βCCl <sub>2</sub>        |
| 265                 | 240          | 2Lib       |                          |
| 250                 | 224          | 2Lib       |                          |
| 133                 | 121          | Lib        |                          |
| 115                 | 103          | Lib        |                          |
| 101                 | 92           | Lib        |                          |

<sup>1</sup> Maxima in the INS simulated spectrum. v and β stand for stretching and bending modes, respectively; Lib stands for pure librational mode.
