# Supplementary material for: Structural Dynamics of Chloromethanes through Computational Spectroscopy: Combining INS and DFT
Source: MDPI journal article supplement (doi:10.3390/molecules27217661), 2022-11-07
Supplement: s1 [file s1]

# *Structural Dynamics of Chloromethanes through Computational Spectroscopy: Combining INS and DFT*

**Mariela M. Nolasco<sup>1\*</sup>, Mariana Matos Coimbra<sup>1</sup>, Stewart F. Parker<sup>2</sup>, Pedro D. Vaz<sup>3</sup>, and Paulo J. A. Ribeiro-Claro<sup>1</sup>**

<sup>1</sup> CICECO—Instituto de Materiais de Aveiro, Departamento de Química, Universidade de Aveiro, 3810-193 Aveiro, Portugal

<sup>2</sup> ISIS Neutron & Muon Source, STFC Rutherford Appleton Laboratory, Chilton, Didcot, Oxfordshire OX11 0QX, UK

<sup>3</sup> Champalimaud Foundation, Champalimaud Centre for the Unknown, 1400-038 Lisboa, Portugal

## *Supplementary Material Document 2 of 2*

### **Contents**

Figure S1. – Atomic displacements of some vibrational modes of carbon tetrachloride, CCl<sub>4</sub>.

Figure S2. – Atomic displacements of some vibrational modes of trichloromethane, CHCl<sub>3</sub>.

Figure S3. – Atomic displacements of some vibrational modes of dichloromethane, CH<sub>2</sub>Cl<sub>2</sub>.

Figure S1. – Atomic displacements of some vibrational modes of carbon tetrachloride,  $\text{CCl}_4$ .

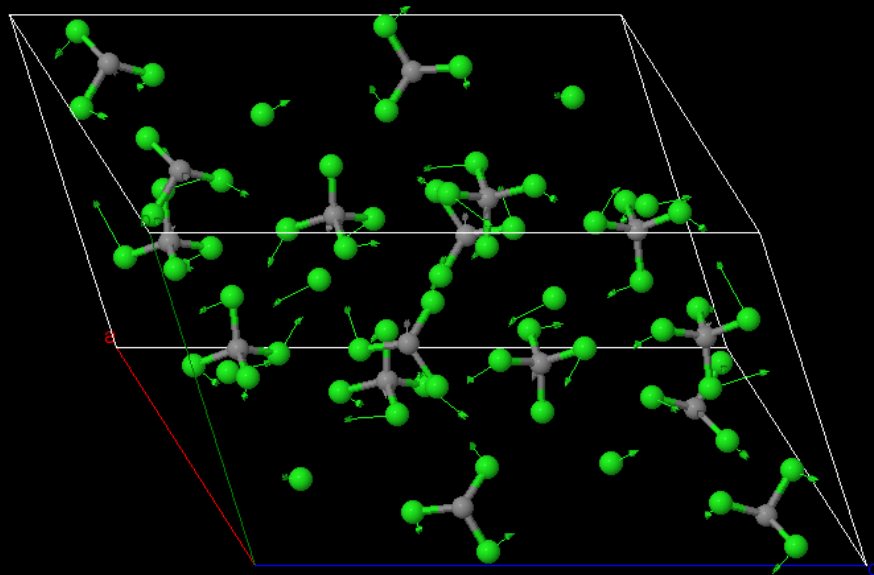

a) Librational mode,  $20\text{ cm}^{-1}$

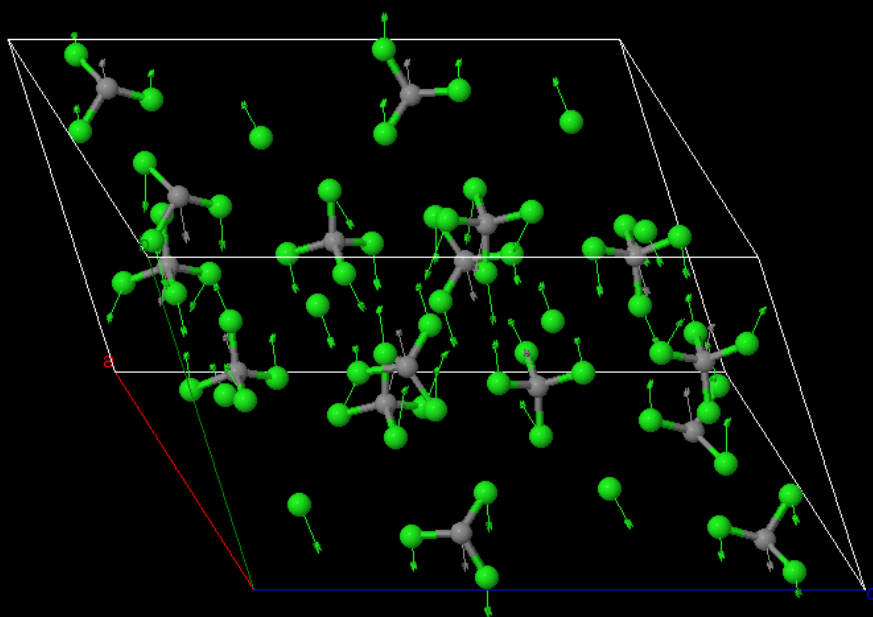

b) translational mode,  $44\text{ cm}^{-1}$

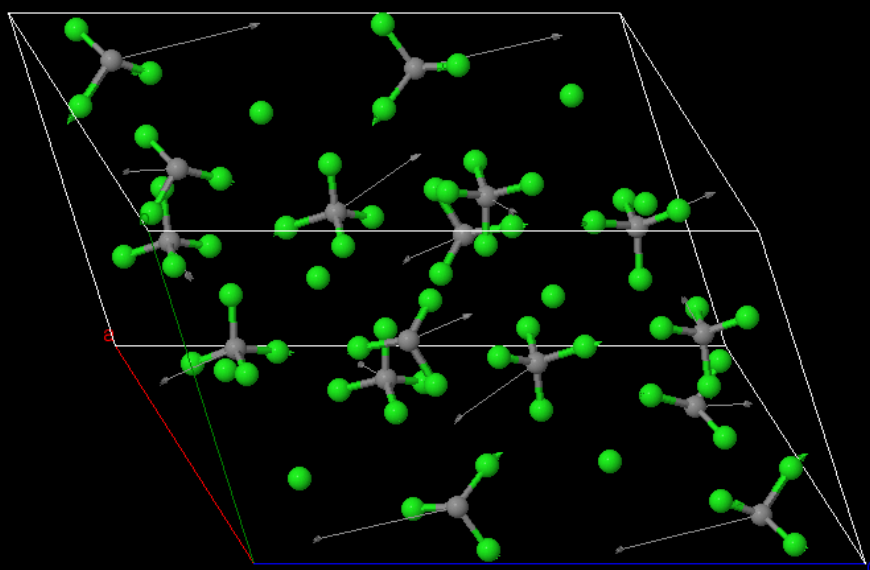

c)  $v_3$  Lowest component

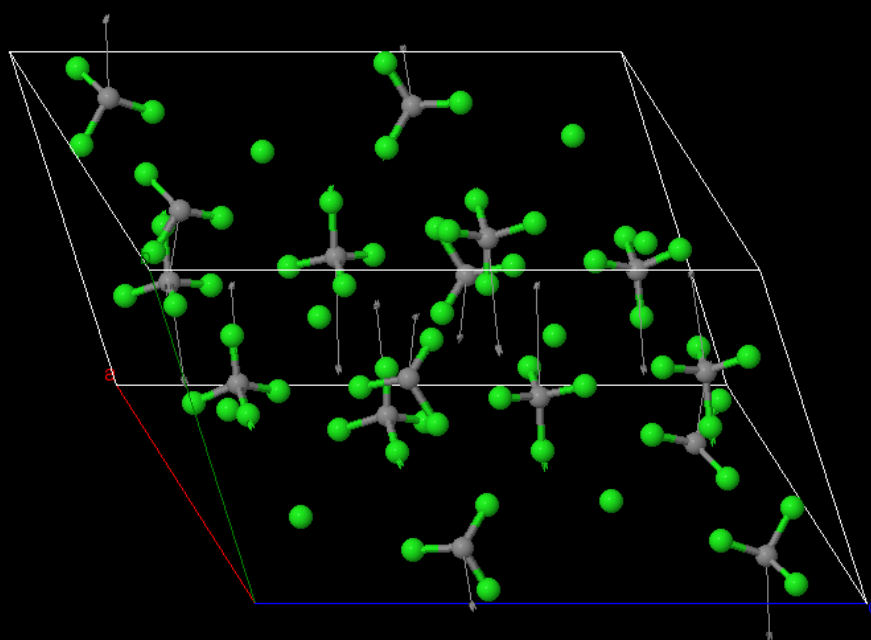

d)  $v_3$  highest component

Figure S2. – Atomic displacements of some vibrational modes of trichlorometane,  $\text{CHCl}_3$ .

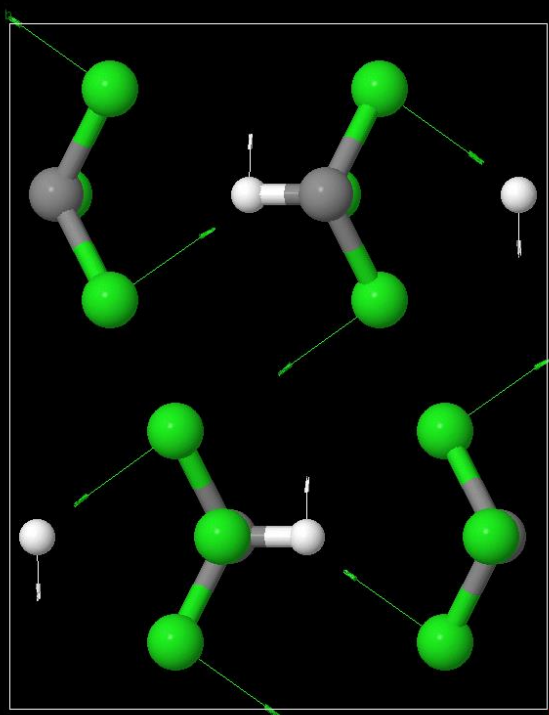

a) Librational mode,  $45 \text{ cm}^{-1}$

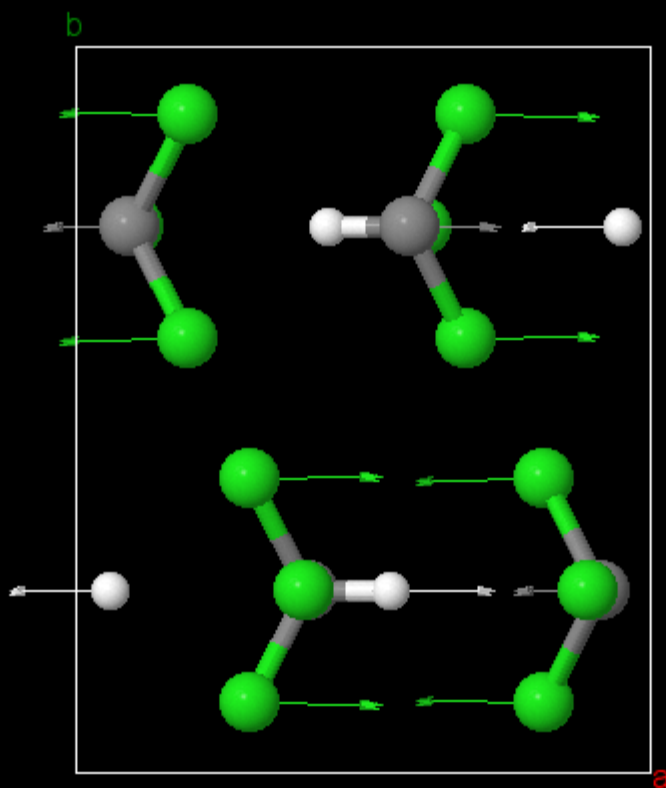

b) Translational mode,  $66 \text{ cm}^{-1}$

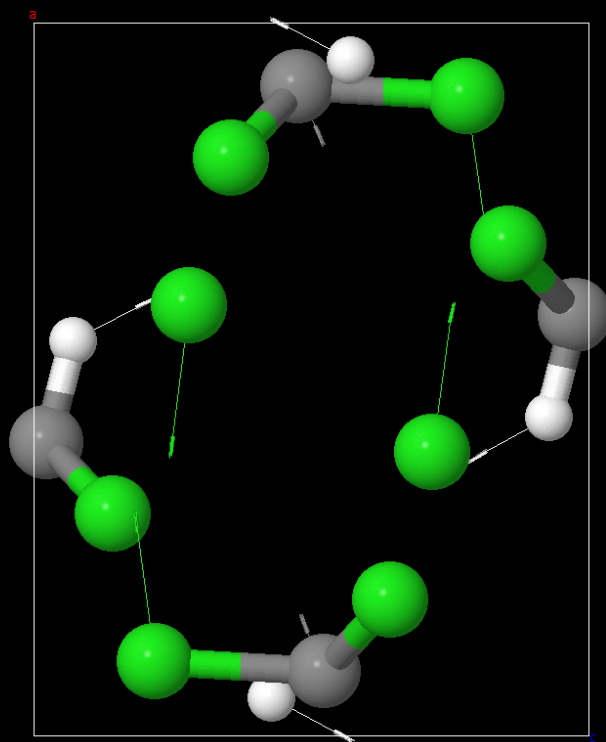

c) Librational mode, 93 cm<sup>-1</sup>

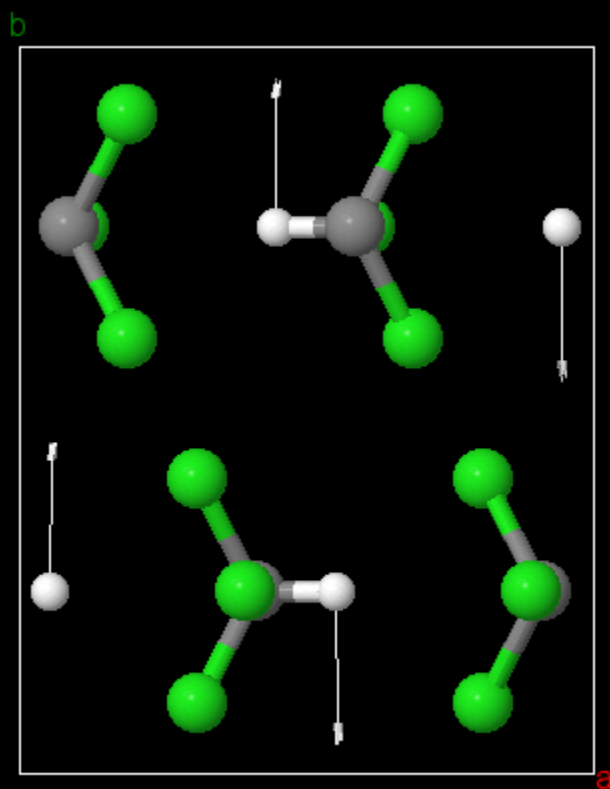

d) CH bending mode, 1180 cm<sup>-1</sup>

Figure S3. – Atomic displacements of some vibrational modes of dichlorometane,  $\text{CH}_2\text{Cl}_2$ .

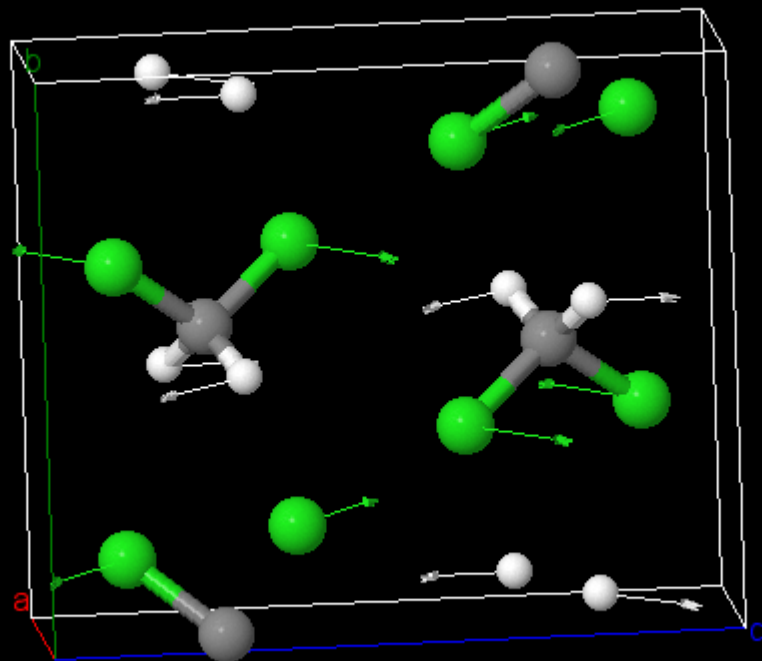

a) Librational mode,  $117\text{ cm}^{-1}$

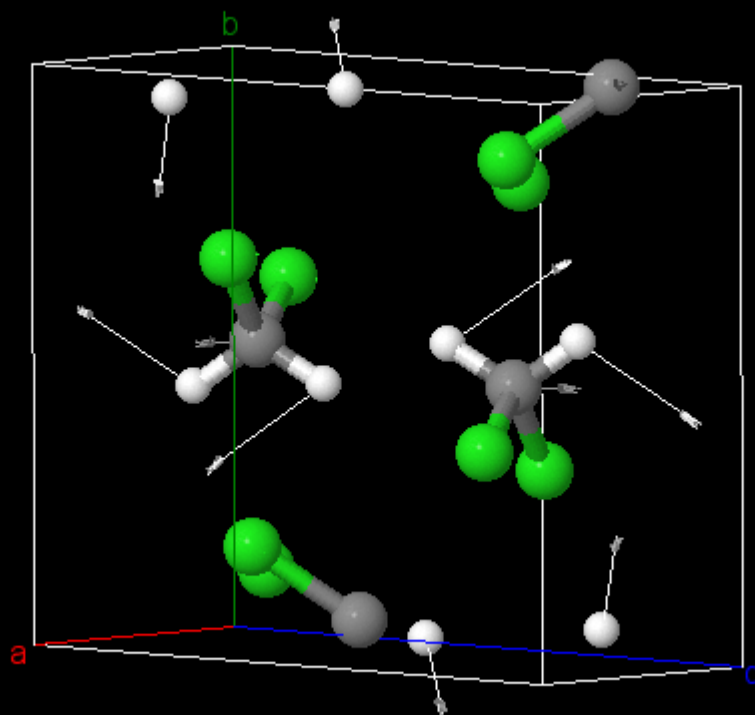

b) Librational mode,  $132\text{ cm}^{-1}$

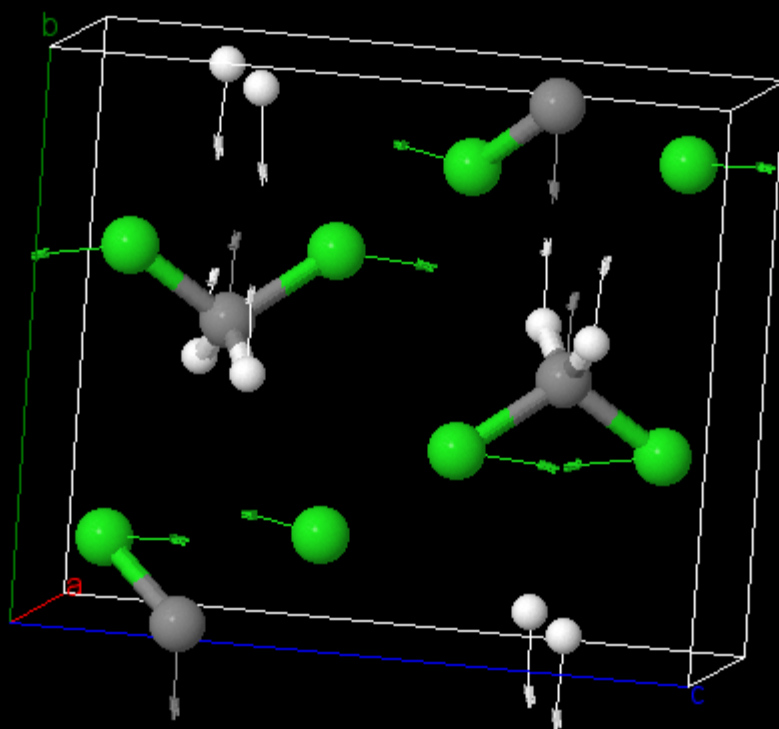

c) CCl<sub>2</sub> bending mode, 283 cm<sup>-1</sup>

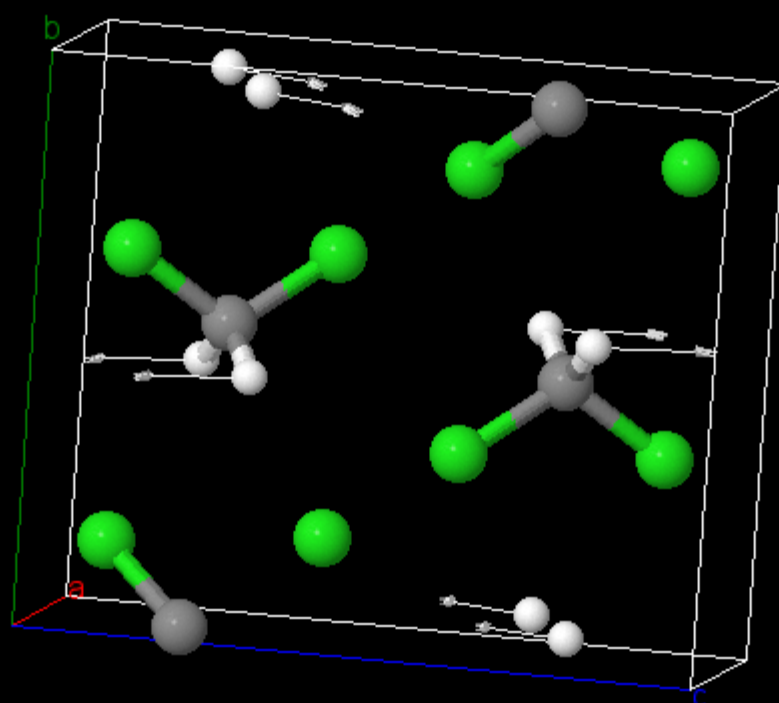

d) CH<sub>2</sub> rocking mode, 1230 cm<sup>-1</sup>
